# Supplementary material for: Is there an association between maternal anxiety propensity and pregnancy outcomes?
Source: Springer Nature journal article supplement (doi:10.1186/s12884-018-1925-8), 2018-07-04
Supplement: MOESM1 [file 15908178]

# **State-Trait Anxiety Inventory for Adults**

## **Self-Evaluation Questionnaire**

STAI Form Y-1 and Form Y-2

**Developed by Charles D. Spielberger**

in collaboration with R.L. Gorsuch, R. Lushene, P.R. Vagg, and G.A. Jacobs

### **Copyright Permission**

**You have purchased permission to reproduce this document up to the maximum number that is shown on the leftmost column of this page. You may not reproduce more than this allotted amount. If you wish to reproduce more than this amount, you are required to purchase bulk permission for each additional copy over the amount that is shown in the leftmost column on this page.**

### **Copyright Policy**

It is your legal responsibility to compensate the copyright holder of this work for any reproduction in any medium. If any part of this Work (e.g., scoring, items, etc.) is put on an electronic or other media, you agree to remove this Work from that media at the end of this license. The copyright holder has agreed to grant one person permission to reproduce this work for one year from the date of purchase for non-commercial and personal use only. Non-commercial use means that you will not receive payment for distributing this document and personal use means that you will only reproduce this work for your own research or for clients. This permission is granted to one person only. Each person who administers the test must purchase permission separately. Any organization purchasing permissions must purchase separate permissions for each individual who will be using or administering the test.

Published by Mind Garden

1690 Woodside Road Suite 202, Redwood City, CA 94061 USA 650-261-3500

[www.mindgarden.com](http://www.mindgarden.com)

**Copyright © 1968, 1977 by Charles D. Spielberger. All rights reserved.**



## SELF-EVALUATION QUESTIONNAIRE STAI Form Y-1

**Please provide the following information:**

Name \_\_\_\_\_ Date \_\_\_\_\_ S \_\_\_\_\_

Age \_\_\_\_\_ Gender (Circle) **M** **F** T \_\_\_\_\_

**DIRECTIONS:**

A number of statements which people have used to describe themselves are given below. Read each statement and then circle the appropriate number to the right of the statement to indicate how you feel *right* now, that is, *at this moment*. There are no right or wrong answers. Do not spend too much time on any one statement but give the answer which seems to describe your present feelings best.

NOT AT ALL  
 SOMEWHAT  
 MODERATELY SO  
 VERY MUCH SO

- |                                                            |   |   |   |   |
|------------------------------------------------------------|---|---|---|---|
| 1. I feel calm.....                                        | 1 | 2 | 3 | 4 |
| 2. I feel secure .....                                     | 1 | 2 | 3 | 4 |
| 3. I am tense .....                                        | 1 | 2 | 3 | 4 |
| 4. I feel strained .....                                   | 1 | 2 | 3 | 4 |
| 5. I feel at ease .....                                    | 1 | 2 | 3 | 4 |
| 6. I feel upset .....                                      | 1 | 2 | 3 | 4 |
| 7. I am presently worrying over possible misfortunes ..... | 1 | 2 | 3 | 4 |
| 8. I feel satisfied .....                                  | 1 | 2 | 3 | 4 |
| 9. I feel frightened .....                                 | 1 | 2 | 3 | 4 |
| 10. I feel comfortable .....                               | 1 | 2 | 3 | 4 |
| 11. I feel self-confident .....                            | 1 | 2 | 3 | 4 |
| 12. I feel nervous .....                                   | 1 | 2 | 3 | 4 |
| 13. I am jittery .....                                     | 1 | 2 | 3 | 4 |
| 14. I feel indecisive.....                                 | 1 | 2 | 3 | 4 |
| 15. I am relaxed .....                                     | 1 | 2 | 3 | 4 |
| 16. I feel content .....                                   | 1 | 2 | 3 | 4 |
| 17. I am worried .....                                     | 1 | 2 | 3 | 4 |
| 18. I feel confused.....                                   | 1 | 2 | 3 | 4 |
| 19. I feel steady.....                                     | 1 | 2 | 3 | 4 |
| 20. I feel pleasant.....                                   | 1 | 2 | 3 | 4 |

# SELF-EVALUATION QUESTIONNAIRE

## STAI Form Y-2

Name \_\_\_\_\_ Date \_\_\_\_\_

### DIRECTIONS

A number of statements which people have used to describe themselves are given below. Read each statement and then circle the appropriate number to the right of the statement to indicate how you *generally* feel. There are no right or wrong answers. Do not spend too much time on any one statement but give the answer which seems to describe how you generally feel.

ALMOST NEVER  
SOMETIMES  
OFTEN  
ALMOST ALWAYS

- |                                                                                                      |   |   |   |   |
|------------------------------------------------------------------------------------------------------|---|---|---|---|
| 21. I feel pleasant.....                                                                             | 1 | 2 | 3 | 4 |
| 22. I feel nervous and restless .....                                                                | 1 | 2 | 3 | 4 |
| 23. I feel satisfied with myself.....                                                                | 1 | 2 | 3 | 4 |
| 24. I wish I could be as happy as others seem to be .....                                            | 1 | 2 | 3 | 4 |
| 25. I feel like a failure .....                                                                      | 1 | 2 | 3 | 4 |
| 26. I feel rested .....                                                                              | 1 | 2 | 3 | 4 |
| 27. I am "calm, cool, and collected".....                                                            | 1 | 2 | 3 | 4 |
| 28. I feel that difficulties are piling up so that I cannot overcome them.....                       | 1 | 2 | 3 | 4 |
| 29. I worry too much over something that really doesn't matter.....                                  | 1 | 2 | 3 | 4 |
| 30. I am happy .....                                                                                 | 1 | 2 | 3 | 4 |
| 31. I have disturbing thoughts .....                                                                 | 1 | 2 | 3 | 4 |
| 32. I lack self-confidence.....                                                                      | 1 | 2 | 3 | 4 |
| 33. I feel secure .....                                                                              | 1 | 2 | 3 | 4 |
| 34. I make decisions easily .....                                                                    | 1 | 2 | 3 | 4 |
| 35. I feel inadequate.....                                                                           | 1 | 2 | 3 | 4 |
| 36. I am content .....                                                                               | 1 | 2 | 3 | 4 |
| 37. Some unimportant thought runs through my mind and bothers me .....                               | 1 | 2 | 3 | 4 |
| 38. I take disappointments so keenly that I can't put them out of my mind.....                       | 1 | 2 | 3 | 4 |
| 39. I am a steady person.....                                                                        | 1 | 2 | 3 | 4 |
| 40. I get in a state of tension or turmoil as I think over my recent concerns<br>and interests ..... | 1 | 2 | 3 | 4 |

# State-Trait Anxiety Inventory for Adults Scoring Key (Form Y-1, Y-2)

Developed by **Charles D. Spielberger** in collaboration with R.L. Gorsuch, R. Lushene, P.R. Vagg, and G.A. Jacobs

To use this stencil, fold this sheet in half and line up with the appropriate test side, either Form Y-1 or Form Y-2. Simply total the scoring **weights** shown on the stencil for each response category. For example, for question # 1, if the respondent marked 3, then the **weight** would be **2**. Refer to the manual for appropriate normative data.

| <b>Form Y-1</b> | <i>NOT AT ALL</i> | <i>SOMEWHAT</i> | <i>MODERATELY SO</i> | <i>VERY MUCH SO</i> | <b>Form Y-2</b> | <i>ALMOST NEVER</i> | <i>SOMETIMES</i> | <i>OFTEN</i> | <i>ALMOST ALWAYS</i> |
|-----------------|-------------------|-----------------|----------------------|---------------------|-----------------|---------------------|------------------|--------------|----------------------|
| 1.              | 4                 | 3               | 2                    | 1                   | 21.             | 4                   | 3                | 2            | 1                    |
| 2.              | 4                 | 3               | 2                    | 1                   | 22.             | 1                   | 2                | 3            | 4                    |
| 3.              | 1                 | 2               | 3                    | 4                   | 23.             | 4                   | 3                | 2            | 1                    |
| 4.              | 1                 | 2               | 3                    | 4                   | 24.             | 1                   | 2                | 3            | 4                    |
| 5.              | 4                 | 3               | 2                    | 1                   | 25.             | 1                   | 2                | 3            | 4                    |
| 6.              | 1                 | 2               | 3                    | 4                   | 26.             | 4                   | 3                | 2            | 1                    |
| 7.              | 1                 | 2               | 3                    | 4                   | 27.             | 4                   | 3                | 2            | 1                    |
| 8.              | 4                 | 3               | 2                    | 1                   | 28.             | 1                   | 2                | 3            | 4                    |
| 9.              | 1                 | 2               | 3                    | 4                   | 29.             | 1                   | 2                | 3            | 4                    |
| 10.             | 4                 | 3               | 2                    | 1                   | 30.             | 4                   | 3                | 2            | 1                    |
| 11.             | 4                 | 3               | 2                    | 1                   | 31.             | 1                   | 2                | 3            | 4                    |
| 12.             | 1                 | 2               | 3                    | 4                   | 32.             | 1                   | 2                | 3            | 4                    |
| 13.             | 1                 | 2               | 3                    | 4                   | 33.             | 4                   | 3                | 2            | 1                    |
| 14.             | 1                 | 2               | 3                    | 4                   | 34.             | 4                   | 3                | 2            | 1                    |
| 15.             | 4                 | 3               | 2                    | 1                   | 35.             | 1                   | 2                | 3            | 4                    |
| 16.             | 4                 | 3               | 2                    | 1                   | 36.             | 4                   | 3                | 2            | 1                    |
| 17.             | 1                 | 2               | 3                    | 4                   | 37.             | 1                   | 2                | 3            | 4                    |
| 18.             | 1                 | 2               | 3                    | 4                   | 38.             | 1                   | 2                | 3            | 4                    |
| 19.             | 4                 | 3               | 2                    | 1                   | 39.             | 4                   | 3                | 2            | 1                    |
| 20.             | 4                 | 3               | 2                    | 1                   | 40.             | 1                   | 2                | 3            | 4                    |
